# Supplementary material for: Predicting creative behavior using resting-state electroencephalography
Source: Springer Nature journal article supplement (doi:10.1038/s42003-024-06461-6), 2024-06-29
Supplement: MOESM2 [file 42003_2024_6461_MOESM2_ESM.pdf]

## Description of Additional Supplementary Files

File name: Supplementary Data 1

Description: The source data behind figure 2.

File name: Supplementary Data 2

Description: The source data behind figure 3.

File name: Supplementary Data 3

Description: The source data behind figure 5.

File name: Supplementary Data 4

Description: The source data behind figure 6
